## Neuronal subtype specification in the spinal cord of a protovertebrate

**Alberto Stolfi and Michael Levine**

There was an error published in *Development* **138**, 995-1004.

On p. 1000, it was incorrectly stated that *Islet* can repress *Vsx* in A13.474 but not in A11.117. The reverse is true, as stated in the legend to Fig. 6B. The corrected text appears below.

*Vsx* can actually induce ectopic *Islet* expression (Fig. 6C), while *Islet* can repress *Vsx* in A11.117, but not in A13.474 (Fig. 6B), hinting at a more complicated interaction between these two genes.

The authors apologise to readers for this mistake.
